# Supplementary material for: Microstructure mapping with time-dependent diffusion MRI differentiates primary central nervous system lymphoma from glioblastoma
Source: Research Square preprint supplement (doi:10.21203/rs.3.rs-8770485/v1), 2026-02-22
Supplement: Supplementary file 1 [file 712bfa0a2d7c494d806c5ad0.docx]

**Microstructure Mapping with****Time-dependent Diffusion MRI Differentiates** **Primary Central Nervous System Lymphoma from** **Glioblastoma**

**ELECTRONIC SUPPLEMENTARY MATERIAL**

**Supplementary Text**

**Routine structural MRI**

Routine structural MRI included T1-weighted images before and after Gd-enhancement, and T2-FLAIR images, with a total acquisition time of 17 min. The protocol parameters were as follows: CE-T1w (TE = 3.5 ms; TR = 7.9 ms; FOV = 250 × 199 × 170 mm3; slice thickness = 1 mm) and FLAIR (TE = 313 ms; TR = 4800 ms; FOV = 250 × 250 × 150 mm3; slice thickness = 2 mm).

**Td-MRI Acquisition and Processing**

OGSE data were acquired at oscillating frequencies of 25 Hz (effective td = 12 ms, 1 cycle, b = 0/250/500/800/1200 s/mm2) and 50 Hz (effective td = 6 ms, 2 cycles, b = 0/100/200/300 s/mm2). PGSE was acquired with diffusion duration/separation = 15.9/77.3 ms at b-value of 0/250/500/1000/1500 s/mm2. The other acquisition parameters were kept the same between the two sequences: echo time/repetition time = 106/3000 ms, field of view = 220 × 220 mm, matrix size = 80 × 80, slice thickness = 5 mm, 11 slices, 1 non-diffusion-weighted image (b0), and sense acceleration factor = 2.

**Data Analysis and Principle of IMPULSED**

td-MRI signals () were fitted using the IMPULSED model [1], a 2-compartment model comprising intra- () and extracellular () components:

where is the measured td-MRI signal, and are the intracellular and extracellular signals, respectively, and represents the volume fraction of the intracellular space. uses sphere geometry and adapts for trapezoid OGSE waveforms [2]. assumes a td-independent exponential decay with extracellular diffusivity (*D*ex).

Microstructural parameters including diameter (), , and were estimated from Eq. 1 using a nonlinear least squares algorithm in Matlab R2024b (Mathworks, Natick, MA) with a fixed intracellular diffusion coefficient at 1.0 µm2/ms. The fitting was repeated 100 times with randomized initializations to avoid local minimums, under the following physiological constraints: 1< <50 µm, 0.01< <1, 0.5< <3.5 µm2/ms. Cellularity was defined as [3]. ADC maps were calculated at each td according to the log-linear fitting to obtain ADC0Hz (PGSE), ADC25Hz and ADC50Hz. The change in ADC (rADC1, rADC2) were calculated using the combination of the ADC:

*100

*100

**References**

1. Jiang X, Li H, Xie J, et al. In vivo imaging of cancer cell size and cellularity using temporal diffusion spectroscopy. Ma{Jiang, 2017 #754}{Xu, 2020 #181}gn Reson Med 2017;78:156-164. https://doi.org/10.1002/mrm.26356.

2. Xu J, Jiang X, Li H, et al. Magnetic resonance imaging of mean cell size in human breast tumors. Magn Reson Med 2020;83:2002-2014. https://doi.org/10.1002/mrm.28056.

3. Wu D, Jiang K, Li H, et al. Time-Dependent Diffusion MRI for Quantitative Microstructural Mapping of Prostate Cancer. Radiology 2022;303:578-587. https://doi.org/10.1148/radiol.211180.

**Supplementary Figures**

Supplementary Figure S1. (**a-b**) ADC values measured at 0 Hz, 25 Hz, 50 Hz in tumor region or (**c-d**) peritumoral edema in GBM and PCNSL. * *P*< 0.05, ** *P* < 0.01, *** *P* < 0.001，*ns* show no significance.


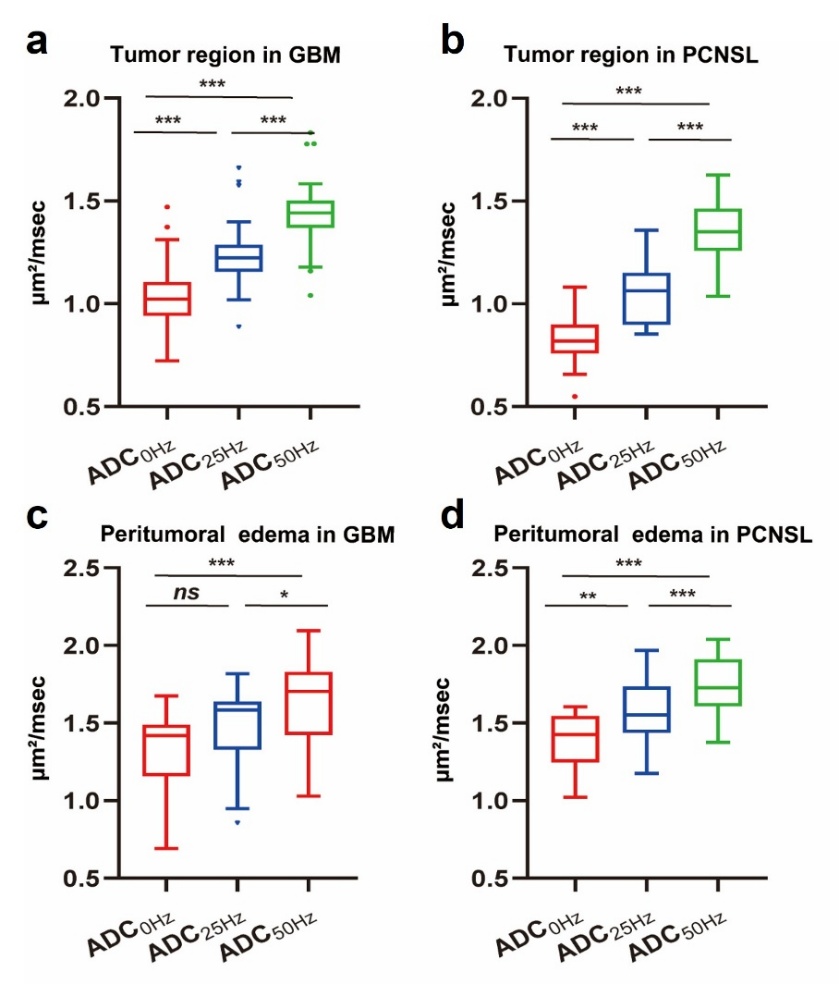


SupplementaryFigure S2.Correlations between the ADC at 0 Hz and cellularity(**a**) or diameter(**b**) estimated from td-dMRI.

**
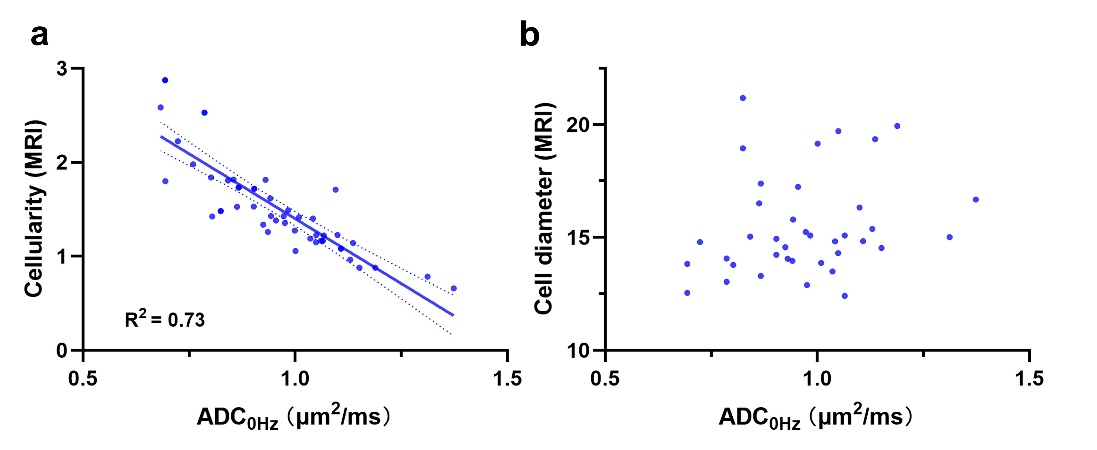
**

**Supplementary Tables**

Supplementary Table S1. Comparison of patient information between PCNSL and GBM.

|  | PCNSL (n = 19) | GBM (n = 32) | *P* value |
| --- | --- | --- | --- |

| Gender  Male  Female | 10 (52.6%)  9 (47.4%) | 20 (62.5%)  12 (37.5%) | 0.489 | | |
| --- | --- | --- | --- | --- | --- |
| Age | 59.95 ± 2.03 | 58.28 ± 2.20 | 0.785 | | |
| Number of lesions (%)  Single  Multiple | 12 (63.2%)  7 (36.8%) | 21 (65.6%)  11 (34.4%) |  | 0.859 | | |
| Location (%)  Only supratentorial  Only infratentorial  Supra-and infratentorial | 15 (78.9%)  0 (0%)  4 (21.1%) | 31 (96.9%)  1 (3.1%)  0 (0%) |  | 0.016 |

Note: Continuous variables are expressed as mean ± standard deviation, while categorical variables are presented as number (percentage).

Supplementary Table S3. Comparison of td-dMRI–derived microstructural parameters for distinguishing the peritumoral edema region of PCNSL and GBM.

| Parameter | PCNSL（n = 19） | GBM（n = 27） | *P* value |
| --- | --- | --- | --- |
| *V*in# | 0.10 ± 0.04 | 0.11 ± 0.06 | 0.647 | |
| Diameter# (μm) | 15.62 ± 0.53 | 15.11 ± 1.05 | 0.097 | |
| Cellularity# (μm-1) | 0.63 ± 0.25 | 0.81 ± 0.55 | 0.415 | |
| *D*ex#(μm2/msec) | 1.68 ± 0.13 | 1.60 ± 0.22 | 0.321 | |
| ADC0Hz#(μm2/msec) | 1.40 ± 0.17 | 1.31 ± 0.27 | 0.343 | |
| ADC25Hz#(μm2/msec) | 1.57 ± 0.18 | 1.47 ± 0.26 | 0.428 | |
| ADC50Hz§(μm2/msec) | 1.76 ± 0.18 | 1.64 ± 0.27 | 0.121 | |
| rADC1#(%) | 10.90 ± 3.15 | 11.23 ± 3.88 | 0.780 | |
| rADC2#(%) | 19.98 ± 4.56 | 20.21 ± 5.90 | 0.251 | |

Note: Continuous variables are expressed as mean ± standard deviation. *V*in = intracellular fraction, *D*ex = extracellular diffusivity, ADC = apparent diffusion coefficient, ADC0Hz= ADC measurement at 0 Hz, ADC25Hz = ADC measurement at 25 Hz, ADC50Hz = ADC measurement at 50 Hz, rADC1 = (ADC25Hz -ADC0Hz)/ADC0Hz, rADC2 = (ADC50Hz -ADC0Hz)/ADC0Hz.

§ *Independent sample t-test*
