# Supplementary material for: Microstructure mapping with time-dependent diffusion MRI differentiates primary central nervous system lymphoma from glioblastoma
Source: Research Square preprint supplement (doi:10.21203/rs.3.rs-8770485/v1), 2026-02-22
Supplement: Supplementary file 2 [file ed58c550d5864c4eca0ba5f6.xlsx]

## Sheet: Supplementary Table S2
Supplementary Table S2. The intraclass correlation coefficients and 95% CIs for td-dMRI–derived microstructural parameters in GBM and PCNSL.
Parameter	GBM		PCNSL
	Tumor region	Peritumoral edema	Tumor region	Peritumoral edema
Vin	0.937（0.874-0.969）	0.916（0.825-0.961）	0.978（0.943-0.991）	0.858（0.668-0.943）
Diameter	0.863（0.738-0.931）	0.885（0.763-0.946）	0.989（0.973-0.996）	0.915（0.793-0.966）
Cellularity	0.953（0.907-0.977）	0.925（0.845-0.965）	0.986（0.964-0.995）	0.861（0.676-0.944）
Dex	0.869（0.749-0.934）	0.869（0.733-0.938）	0.953（0.882-0.982）	0.868（0.689-0.947）
ADC0Hz	0.908（0.820-0.954）	0.881（0.756-0.944）	0.964（0.910-0.986）	0.878（0.712-0.951）
ADC25Hz	0.897（0.801-0.949）	0.873（0.742-0.940）	0.976（0.938-0.991）	0.910（0.783-0.964）
ADC50Hz	0.865（0.742-0.932）	0.854（0.704-0.930）	0.954（0.886-0.982）	0.895（0.748-0.958）
rADC1	0.867（0.761-0.937)	0.914（0.820-0.960）	0.982（0.955-0.993）	0.905（0.772-0.962）
rADC2	0.939（0.878-0.970)	0.956（0.906-0.980）	0.992（0.979-0.997）	0.881（0.717-0.952）
Note: Data in parentheses are 95% CIs. Vin = intracellular fraction, Dex = extracellular diffusivity, ADC = apparent diffusion coefficient, ADC0Hz= ADC measurement at 0 Hz, ADC25Hz = ADC measurement at 25 Hz, ADC50Hz = ADC measurement at 50 Hz, rADC1 = (ADC25Hz -ADC0Hz) / ADC0Hz, rADC2 = (ADC50Hz -ADC0Hz) / ADC0Hz, CIs: confidence intervals.

## Sheet: Supplementary Table S4
Supplementary Table S4. Diagnostic performance in differentiating PCNSL from GBM in tumor and peritumoral region with microstructural parameters.
Parameter	AUC	SPE	SEN	ACC	Cutoff
Tumor region
Vin§	0.901 (0.815-0.987)	0.906	0.737	0.843	0.241
Diameter§ (μm)	0.669 (0.503-0.836)	0.938	0.474	0.765	13.394
Cellularity§ (μm-1)	0.885 (0.788-0.982)	0.781	0.895	0.824	1.537
Dex# (μm2/msec)	0.747 (0.601-0.892)	0.656	0.79	0.706	1.352
ADC0Hz§ (μm2/msec)	0.864 (0.754-0.973)	0.781	0.895	0.824	0.942
ADC25Hz# (μm2/msec)	0.809 (0.675-0.944)	0.781	0.842	0.804	1.154
ADC50Hz# (μm2/msec)	0.640 (0.479-0.801)	0.781	0.526	0.686	1.357
rADC1§ (%)	0.831 (0.690-0.971)	0.969	0.684	0.863	21.646
rADC2§ (%)	0.873 (0.754-0.992)	0.969	0.737	0.882	34.13
Peritumoral edema
Vin§	0.540 (0.370-0.710)	0.148	1	0.465	0.201
Diameter§ (μm)	0.645 (0.483-0.807)	0.63	0.632	0.63	15.56
Cellularity (μm-1)	0.571 (0.403-0.740)	0.333	0.842	0.523	0.833
Dex# (μm2/msec)	0.587 (0.420-0.754)	0.333	0.947	0.562	1.515
ADC0Hz§ (μm2/msec)	0.583 (0.415-0.750)	0.778	0.421	0.645	1.491
ADC25Hz# (μm2/msec)	0.569 (0.400-0.739)	0.333	0.842	0.523	1.401
ADC50Hz# (μm2/msec)	0.604 (0.438-0.770)	0.815	0.421	0.668	1.854
rADC1§ (%)	0.524 (0.354-0.694)	0.407	0.737	0.53	9.378
rADC2§ (%)	0.600 (0.424-0.777)	0.667	0.632	0.654	19.99
Note: Data in parentheses for AUCs are 95% confidence intervals. AUC, area under the ROC curve; SPE, specificity; SEN, sensitivity; ACC, accuracy. Vin = intracellular fraction, Dex = extracellular diffusivity, ADC = apparent diffusion coefficient, ADC0Hz= ADC measurement at 0 Hz, ADC25Hz = ADC measurement at 25 Hz, ADC50Hz = ADC measurement at 50 Hz, rADC1 = (ADC25Hz -ADC0Hz)/ADC0Hz, rADC2 = (ADC…
